# Supplementary material for: Three-dimensional quantitative analysis of temporal region morphology in Chinese young adult
Source: PeerJ. 2023 Feb 2;11:e14226. doi: 10.7717/peerj.14226 (PMC9899427; doi:10.7717/peerj.14226)
Supplement: Supplemental Information 1 [file peerj-11-14226-s001.xlsx]

## Sheet: Sheet1
rating	gender	age	BMI	fq	czl	wym	zcm	rank	TDV
-1	female	18	19.4771	123.659	24.2457	30.5769	27.9409	1	28.3827
-1	female	20	17.2635	47.1079	22.4166	47.472	26.247	1	26.6968
-1	male	21	20.4783	38.42	10.7025	21.1728	10.384	1	25.0273
-1	female	20	19.8347	22.2768	14.2366	14.6601	17.1309	1	24.6971
1	male	18	25.3815	75.513	6.99947	18.1956	10.2671	1	25.8358
1	male	21	19.8839	23.0519	10.2635	7.712	7.36454	1	24.1658
1	male	18	21.9713	65.8758	18.7197	40.1395	20.3827	1	26.7468
1	female	20	22.0317	26.8264	5.63787	15.6256	7.65761	1	24.3621
1	male	18	22.4913	50.8496	20.4896	16.5229	20.2456	1	25.7592
1	female	18	18.9036	219.01	8.74289	37.6253	39.3192	1	31.005
1	male	20	23.3887	129.996	17.3245	48.8166	43.546	1	29.2702
1	male	17	20.7157	38.0498	12.891	24.1125	14.1816	1	25.2556
1	female	20	21.875	30.6696	24.8197	31.7868	21.9947	1	25.7903
1	female	19	16.3304	26.4026	8.51893	39.947	12.3857	1	25.2028
1	female	20	20.1348	21.6006	5.78921	11.7851	9.36268	1	24.1697
1	female	19	18.026	118.633	4.59723	7.16383	8.18012	1	26.5722
1	male	20	21.6049	36.9577	21.0367	32.0788	27.1552	1	26.0026
1	male	21	20.4082	58.5736	23.5488	52.2885	25.0796	1	27.1303
1	male	19	21.0667	39.9103	14.4089	19.0835	20.5276	1	25.3809
1	female	22	18.7962	70.1136	16.1089	29.1458	14.518	1	26.3404
1	male	22	20.984	45.6756	24.3692	13.918	9.59426	1	25.371
1	male	18	22.7732	35.3205	22.6445	15.8134	27.5487	1	25.5783
1	male	21	18.3768	35.1043	17.4895	22.4393	20.3828	1	25.4206
1	female	18	19.3359	39.0303	23.0089	25.5146	18.0915	1	25.6935
1	female	21	18.9292	52.6657	15.5339	27.3751	27.9172	1	26.1698
1	male	20	18.8121	57.9342	11.5538	9.31058	14.4732	1	25.3634
1	male	22	20.4382	44.3195	9.95403	16.1095	11.7831	1	25.067
2	male	19	18.3058	45.5971	15.7659	22.9015	18.3436	1	25.6125
2	female	29	17.2248	48.8588	9.9758	15.0784	11.2583	1	25.1472
2	male	21	22.0386	167.223	15.2988	28.7986	25.8163	1	29.2022
2	male	21	19.4094	77.3358	18.4452	35.4091	22.8819	1	26.9858
2	male	21	21.3741	26.5795	8.37577	18.494	10.3392	1	24.5766
0	female	20	22.5686	19.4264	6.51187	8.73859	5.28498	0	23.9409
0	female	18	19.6283	33.3378	8.11815	12.6421	10.4138	0	24.5959
0	male	20	22.6422	108.2	8.36685	29.4422	20.7879	0	27.3253
0	female	18	20.5693	62.4183	26.173	28.5406	17.3204	0	26.4622
0	female	18	16.4446	15.3655	4.88161	7.28301	3.41369	0	23.7002
0	female	21	19.487	26.8385	13.0709	8.6608	10.2843	0	24.445
0	female	21	22.4913	83.0431	9.28849	11.1271	17.7674	0	26.1093
0	female	21	17.7999	23.6752	4.22979	5.54536	6.02456	0	23.9279
0	female	21	18.4911	18.6439	6.59965	9.28666	4.85651	0	23.9255
0	male	22	18.1449	99.3202	22.168	31.0911	25.3679	0	27.6228
0	female	20	19.3698	84.9441	4.37123	20.4851	8.45801	0	26.0301
0	female	22	22.0317	45.3384	8.5025	11.5958	6.0374	0	24.7817
0	female	21	21.0962	39.9849	7.8252	16.3551	17.1026	0	25.0431
0	female	21	18.6453	25.5766	11.582	15.1275	10.8576	0	24.5594
0	male	22	18.5132	118.299	22.1916	25.9592	17.9203	0	27.7942
0	female	20	17.5781	53.4335	6.56729	15.7656	6.91664	0	25.0808
0	female	28	22.3586	36.7994	21.9603	14.7209	18.8063	0	25.3371
0	female	19	17.1468	18.7295	4.54777	8.00091	7.58792	0	23.9116
0	female	20	56.8889	32.9453	10.4836	35.6499	21.7665	0	25.5655
0	female	20	20.5499	79.7301	17.1943	24.1554	21.2095	0	26.6713
0	female	19	21.7738	24.1756	14.0328	15.0654	12.1201	0	24.6195
0	female	28	20.4491	92.5323	24.4962	29.9238	11.3124	0	27.0976
0	female	18	21.7993	80.8747	11.0685	20.3757	9.41644	0	26.1229
0	female	21	18.902	21.9737	4.55966	24.3831	9.64513	0	24.4905
0	female	21	17.9089	18.3774	8.21065	18.0915	18.0726	0	24.549
0	female	20	17.6898	18.1863	12.3586	11.166	9.0446	0	24.2289
0	female	21	22.6667	16.6522	11.4423	13.6801	9.67673	0	24.2474
0	female	22	20.0288	98.1063	19.658	53.7315	24.2706	0	28.0983
0	female	18	19.3772	22.5143	6.02129	9.52816	12.5659	0	24.2255
0	female	19	20.5693	34.3253	9.1786	15.7872	13.2974	0	24.8115
0	female	20	21.6041	18.9547	4.94643	12.4601	7.96805	0	24.0574
0	male	20	19.1571	23.1922	11.5231	14.3871	11.0723	0	24.4802
0	female	21	19.1953	18.4796	6.4998	14.4864	10.7332	0	24.214
0	female	18	21.7555	43.7225	6.51433	5.15353	7.7145	0	24.5584
0	female	21	18.5901	28.9265	6.97317	8.92603	8.44385	0	24.296
0	female	22	17.4818	21.289	24.8551	18.1613	69.9134	0	26.456
0	female	20	16.7062	36.0488	9.45269	7.74746	15.2247	0	24.7017
0	female	18	16.609	26.5153	18.744	18.2718	16.4962	0	25.01
0	female	18	20.7008	17.3738	4.9547	20.906	11.5923	0	24.3375
0	female	21	19.5312	66.8184	19.875	50.7303	42.3868	0	27.6726
0	male	19	23.1206	29.1094	11.7204	11.1404	10.2076	0	24.5337
0	male	22	26.0617	109.209	16.7928	25.3215	13.4694	0	27.2718
0	male	19	24.6755	51.3575	20.1548	16.6723	17.3724	0	25.6912
